# Supplementary material for: CD101, a Novel Echinocandin, Possesses Potent Antibiofilm Activity against Early and Mature Candida albicans Biofilms
Source: PubMed Central journal article supplement (PMC5786756; doi:10.1128/aac.01750-17), 2018-01-25
Supplement: AAC.01750-17_zac002186844s5.pdf [file AAC.01750-17_zac002186844s5.pdf]

1 **SUPPLEMENTAL MOVIE LEGENDS**

2

3 **Movie S1. Temporal Development of *C. albicans* Untreated Mature Biofilms:** Time-  
4 lapse movie was captured immediately after 0 h and followed upto 16 h. It showed  
5 untreated *C. albicans* blastospores adhering to catheter discs at 0 h and started to germinate  
6 within 2 h. These germ tubes extended and formed a mesh of hyphae within 3 h. After 6 h,  
7 biofilm matrix started to engulf the fungal structures and, by 10 h, a highly heterogeneous  
8 3-dimensional architectural biofilm structure was formed, which consisted of yeast and  
9 hyphae embedded within an extracellular matrix representing a mature biofilm.

10

11 **Movie S2. Temporal Effect of CD101 (0.25 µg/ml) on Formation of *C. albicans***  
12 **Biofilms (x20):** Time-lapse movie was captured immediately after 0 h and followed upto  
13 16 h at low magnification, x20. Adhered fungal cells exposed to 0.25 µg/ml CD101 were  
14 arrested in their development and showed only adhered cells with short hyphae and stunted  
15 growth (until 16 h, mature phase). Bulged/deformed cells were visible after 2 h (arrows).  
16 CD101 disrupted fungal cells and caused hyphal tips to burst releasing string-like contents  
17 after 9-10 h (arrows). CD101-treated hyphae failed to grow into mature biofilms.

18

19 **Movie S3. Temporal Effect of CD101 (0.25 µg/ml) on Formation of *C. albicans***  
20 **Biofilms (x63) :** Time-lapse movie was captured immediately after 0 h and followed upto  
21 16 h at high magnification, x63. Incubation of fungal cells with 0.25 µg/ml CD101 stopped  
22 cell growth within minutes after exposure. Adhered cells with short hyphae and stunted  
23 growth were visible until 16 h, mature phase (arrows). Bulged/deformed cells were clearly

24 visible at high magnification, after 2 h (arrows). CD101 disrupted fungal cells and caused  
25 hyphal tips to burst releasing string-like contents after 9-10 h, (arrows). CD101-treated  
26 hyphae failed to grow into mature biofilms.

27

28 **Movie S4. Temporal Effect of CD101 (0.25 µg/ml) on 3 h Formed *C. albicans* Biofilms:**

29 Time-lapse movie was captured immediately after adding the drug and followed upto 16  
30 h. In this movie, *C. albicans* blastospores were allowed to germinate and form biofilms for  
31 3 h post adherence before adding CD101 (0.25 µg/ml). Growth of 3 h-old germinating  
32 fungal biofilm cells was stopped within minutes after they were exposed to 0.25 µg/ml  
33 CD101. Cells/hyphae bulged and were deformed after 2-3 h (arrows). Broken hyphae with  
34 bursting tips and releasing contents from them were visible after 8-10h (arrows). By 16 h  
35 CD101-treated hyphae failed to grow into mature biofilms.

36

37

38
